# Supplementary material
Source: PubMed Central journal article supplement (PMC4455062)
Supplement: ncomms8223-s1.pdf [file ncomms8223-s1.pdf]

## **Piezo1 ion channel pore properties are dictated by C-terminal region**

Bertrand Coste<sup>1,2,5,\*</sup>, Swetha E. Murthy<sup>2,5</sup>, Jayanti Mathur<sup>3</sup>, Manuela Schmidt<sup>2,4</sup>, Yasmine Mechioukhi<sup>1</sup>, Patrick Delmas<sup>1</sup>, Ardem Patapoutian<sup>2,3</sup>

<sup>1</sup>Aix Marseille Université, CNRS, CRN2M-UMR7286, 13344 Marseille France.

<sup>2</sup>Howard Hughes Medical Institute, Molecular and Cellular Neuroscience, The Scripps Research Institute, La Jolla, California 92037, USA.

<sup>3</sup>Genomics Institute of the Novartis Research Foundation, San Diego, California 92121, USA.

<sup>4</sup>Present Address: Somatosensory Signaling Group; Max Planck Institute of Experimental Medicine, 37075 Goettingen, Germany.

<sup>5</sup>These authors contributed equally to this work

\*Correspondence: [bertrand.coste@univ-amu.fr](mailto:bertrand.coste@univ-amu.fr) (B.C.)

## Supplemental Figures and Legends

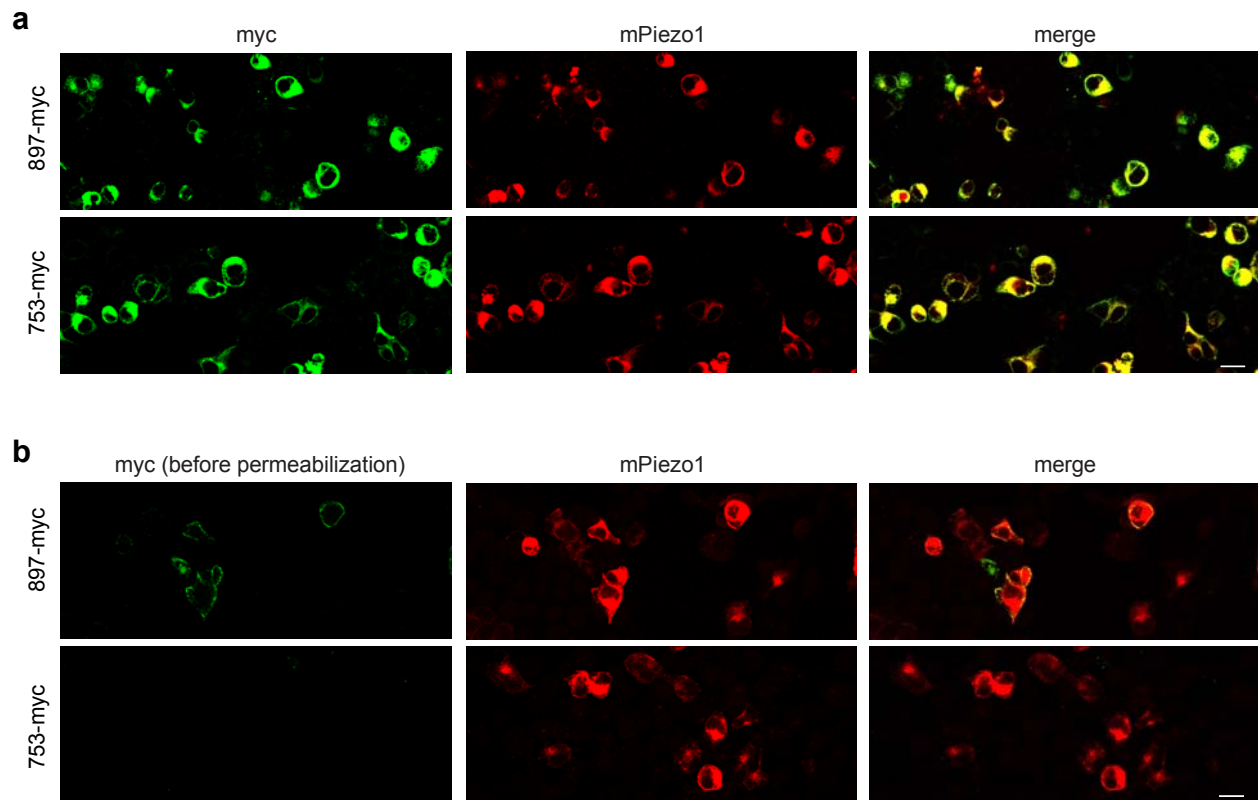

**Supplementary Figure 1. Staining of mPiezo1-myc constructs using mPiezo1 antibody as a control of myc-tag localization experiments.** (a) Representative images of labeling using a myc antibody (green, left panels) and mPiezo1 antibody (red, middle panels) in mPiezo1-myc transfected cells. Myc tags were inserted at position 897 or 753, as specified. Staining using myc- and mPiezo1-antibodies overlap (right panels), illustrating that the position of myc-tag insertion does not affect their accessibility. (b) Same as (a) except that myc staining was performed before permeabilization. The level of expression of both mPiezo1-myc constructs evaluated by mPiezo1 labelling is similar illustrating that lack of myc staining of 753-myc constructs under these conditions is not due to lower expression. Scale bar: 20  $\mu$ m. Note that Myc labelling images in panel (a) and (b) are the same used in Fig1a, left and right panels, respectively.

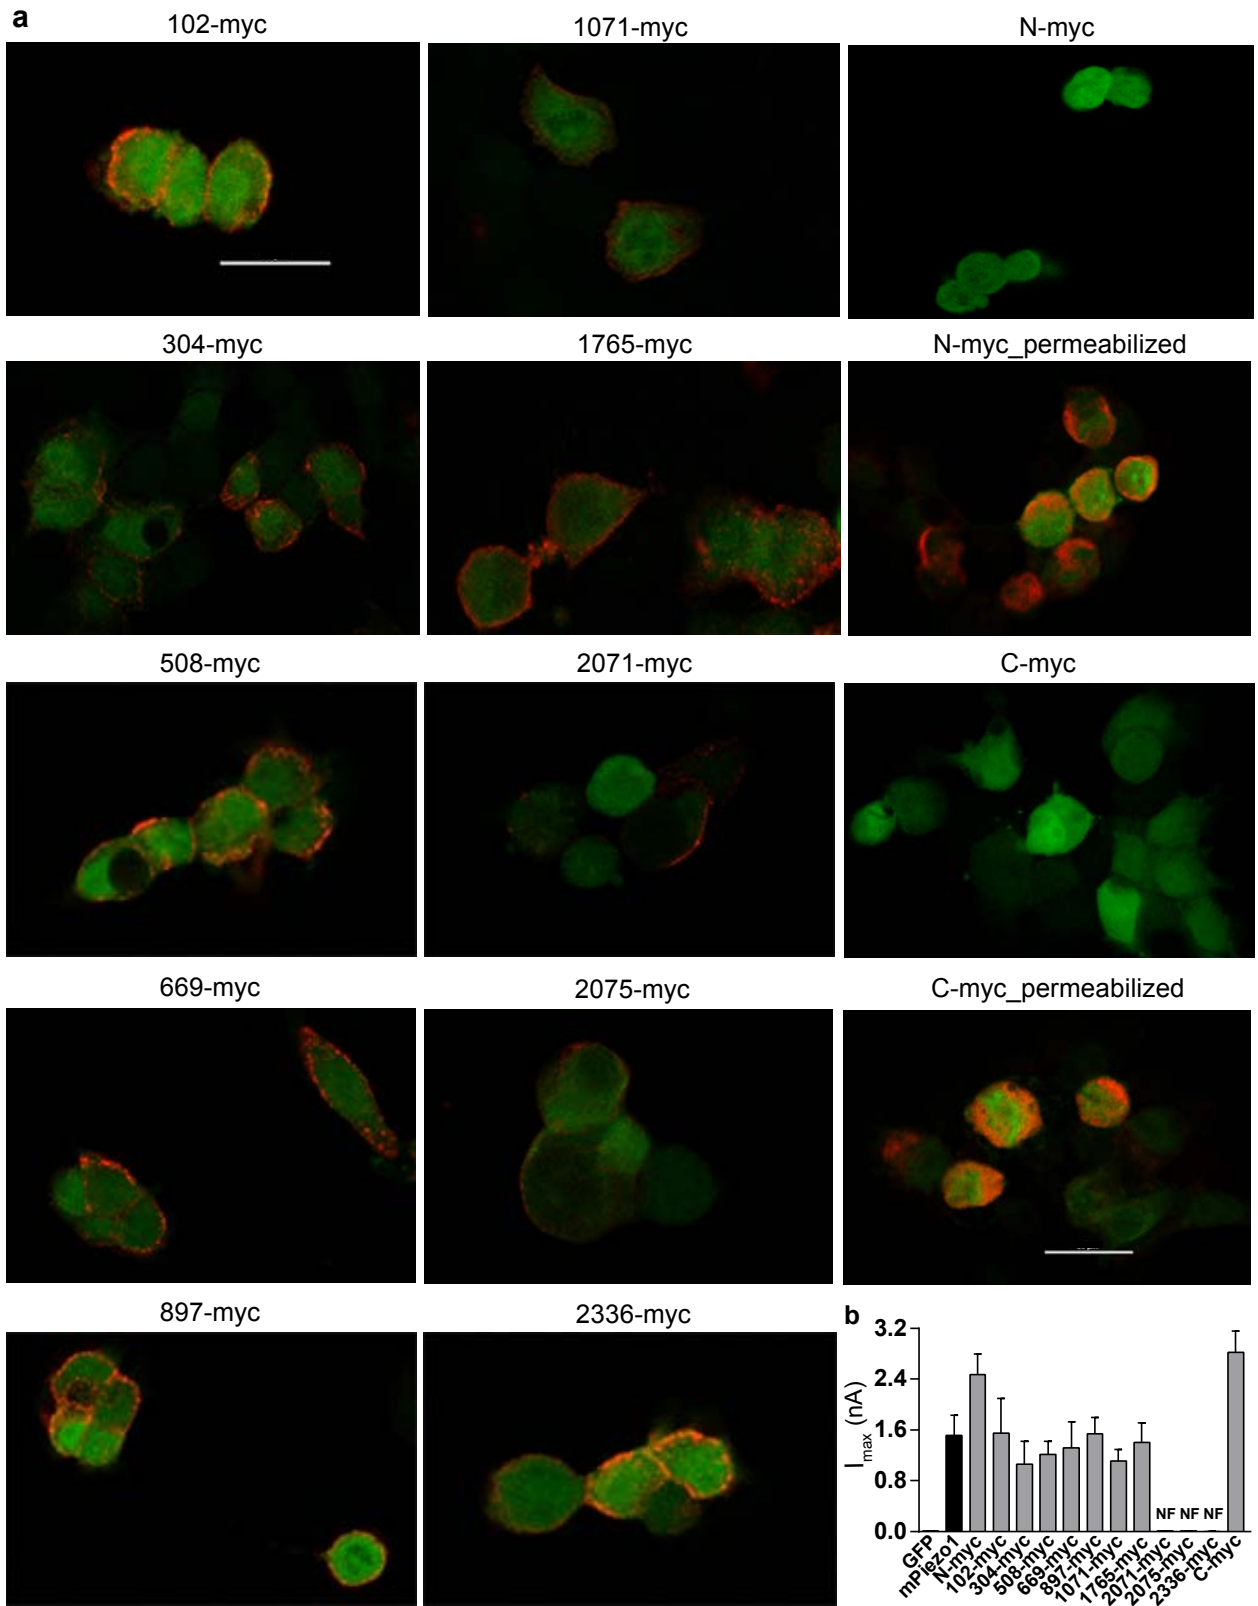

**Supplementary Figure 2. Myc staining and functionality data of mPiezo1 myc-tag constructs.** (a) Representative images of non-permeabilized and permeabilized staining using a myc antibody (red) in mPiezo1-myc iresGFP transfected cells. scale bar 20  $\mu\text{m}$ . Note that extracellular myc detection signal of 2071- and 2075-myc constructs is weaker than for other constructs positively stained by anti-myc without permeabilization. This could reflect impaired membrane trafficking for these two constructs. (b) Bar graph representing MA whole-cell  $I_{\text{max}}$  currents recorded from cells transfected with GFP only, mPiezo1, or mPiezo1 with a myc tag at the following amino acid positions N-terminal, 102, 304, 508, 669, 897, 1071, 1765, 2071, 2075, 2336 and C-terminal (n= 9, 5, 4, 5, 6, 5, 5, 7, 7, 4, 5, 8, 9 and 5, respectively).

mPiezo1 MEPHVLGAGLYWLLLPCTLLAASLLRFNALSIVYLLFLLLLPWLPGPSRHSIPGHTGRLL 60

mPiezo2 MASEVVCGLIFRLLLPICLAVACAFRYNGLSFVYLIYLLLIPLFSEPTKATMQGHTGRLL 60

hPiezo1 MEPHVLGAVLYWLLPCALLAACLLRFSGLSLVYLLFLLLLPWFPGPTRCGLQGHTRLL 60

hPiezo2 MASEVVCGLIFRLLLPICLAVACAFRYNGLSFVYLIYLLLIPLFSEPTKATMQGHTGRLL 60

dPiezo MVFSYACMVLQRIVVPAVLVLAALMRPVGISFVYLLMFFVSPFVPLATRRNFKGSVTAF 60

  

mPiezo1 RALLCLSLLFLVAHLAQICLHTVPHLDQFL-GQNGSLWVKV<sup>S</sup>OHIGVTRLDLKDIFNTT 119

mPiezo2 QSLCITSLSFLLLHIIFHITLVALEAQHRITPAYNCSTWEKTRFQIGFESLKGADAGNGI 120

hPiezo1 RALLGLSLLFLVAHLALQICLHTVPRLDQLL-GPSCSRWETLSRHIGVTRLDLKDIPNAI 119

hPiezo2 KSLCFISLSFLLLHIIFHITLVSLEAQHRIAPGYNCSTWEKTRFQIGFESLKGADAGNGI 120

dPiezo IILLTLSTLVLLGHITLQILAVSLT----LPIYNCSFSERLLRHIGFVSFIDLQFFAI 115

  

mPiezo1 RLVAPDLGVLLASSLCLGLCGRLTRKAGQSRRTQELQDDDDDDDDDEDIDAAPAVG--- 176

mPiezo2 RVFVPDIMGFIASLTITWLCRTIVKKPDTEEIAQLNSECENEELAGGKMDSEALIYEE 180

hPiezo1 RLVAPDLGILVVSSVCLGICGRLARNTRQSPHPRELDDE-----RDVDASPTAG--- 169

hPiezo2 RVFVPDIMGFIASLTITWLCRTIVKKPDTEEIAQLNSECENEELAEAEKEIYEE 180

dPiezo EWLVPVLFVATSLGSLYLVKRVASQPVGAQLENGEVVDGQAENAQTSSQPSAADANG- 174

  

mPiezo1 -----LKGAPALATKRRLW-LASRFRVTAHWLLMTSGRTLVIIVLLALA-----G 219

mPiezo2 DLDGEEGMEGELEESTKLIKLRRFASVASKLKEFIGNMITTAGKVVVVILLGSS-----G 235

hPiezo1 -----LQEAATLAPTRRSR-LARFRVTAHWLLVAAGRVLAVTLLALA-----G 212

hPiezo2 DFNGGDVEGELEESTKLMFRRLASVASKLKEFIGNMITTAGKVVVVILLGSS-----G 235

dPiezo -----GDVQQATVTTPLQQQQQLRKRVMISQIHFEGLVKISPLFCLATLFFAA 225

  

mPiezo1 IAHPSAFSSIYLVFLAICTWWSCHFPLSPGLGFNTLCVMVSCFGAGHLICLYCYQTPFIQ 279

mPiezo2 MMLPSLTSAVYFFVFLGLCTWWSWCRTFDPLLFGLCLCVLLAIFTAGHLIGLYLYQFQFFQ 295

hPiezo1 IAHPALSSSVYLLFLALCTWACHFPISTRGFSRLCAAVGCFGAGHLICLYCYQMPLAQ 272

hPiezo2 MMLPSLTSSVYFFVFLGLCTWWSWCRTFDPLLFGLCLCVLLAIFTAGHLIGLYLYQFQFFQ 295

dPiezo VLRPSVPGGFYFLIFLLSGTYWATCQTLQRG-FALLLRVMMVVLVHLSLSIVSYQTPWMQ 284

  

mPiezo1 DMLPPGNIWARLFGKNFVDLPNY<sup>S</sup>SPNALVLNTHKAWPIYVSPGILLLLYYTATSLKL 339

mPiezo2 EAVPPNDYYARLFGIKSVIQT-DCASTWKIIVNPDLSWYHHPANILLVMYYTLATLIRI 354

hPiezo1 ALLPPAGIWARVLGLKDFVGPNTCCSPHALVLNTHGLDWPVYASPGVLLLCYATASLRKL 332

hPiezo2 EAVPPNDYYARLFGIKSVIQT-DCSSTWKIIVNPDLSWYHHPANILLVMYYTLATLIRI 354

dPiezo SHLNHTTLTARLIGLEPLIESYCSPIRIVFLYNNKLSLDSYLNPFALFFAYFALALTTKH 344

  

mPiezo1 HKSCPSLRKE<sup>T</sup>IPRED-----EEHELELDHLEPEPQAR-----DATQG 377

mPiezo2 WLQEPVQVEEMAKEDEGALDCSSNQNTAERRRSLWYATQYPTDERKLLSMTQDDYKPSDG 414

hPiezo1 RAYRPSGQRKEAAKGY-----EARELELAELDQWPQER-----ESDQH 370

hPiezo2 WLQEPVQDEGTKEEDKALACSPIQITAGRRLSLWYATHYPTDERKLLSMTQDDYKPSDG 414

dPiezo LIKPRLVQRSTRKART-----PQPLES-----GSSVA 371

  

mPiezo1 EMPMTTEPDLNCTVH-----VLT<sup>S</sup>Q<sup>S</sup>SPVRQRPVPRPRLAELKE 415

mPiezo2 LLVTVNGNPVDYHTIHPSLPIENGPACTDLYTTPQYRWEPSSESEKKEEEDKREDESEG 474

hPiezo1 VVTPADTEADNCTVH-----ELTGQSSLLRRPVRPKRAEPGE 408

hPiezo2 LLVTVNGNPVDYHTIHPSLPMENGPCKADLYSTPQYRWEPSDESEKKEEEDKREDESEG 474

dPiezo PSVTQRGNMQLESME-----QRSEQENTTTSILDQISY 405

  

mPiezo1 -----MSPLHGLGHLIMDQSYVCALIAMMVWSIMYHSWLTFVLLLWACLIIWTVR 464

mPiezo2 EGSQBEKRSVRMHAMVAVFQFIMKQSYICALIAMMAWSITYHSWLTFVLLIWSCTLWMIR 534

hPiezo1 -----ASPLHSLGHLIMDQSYVCALIAMMVWSITYHSWLTFVLLLWACLIIWTVR 457

hPiezo2 ERSREKRSIKVHAMVSVFQFIMKQSYICALIAMMAWSITYHSWLTFVLLIWSCTLWMIR 534

dPiezo G-----FVSVGGFIYQNSYIFTNIIIMMAWSIVYHSWLTFVLLLSANVLWMI 452

  

mPiezo1 SRHQLAMLCSPCILLYGLTLCCLRYVWAMEL--PELPTTLGPVSL-----HQLGLEHTR 516

mPiezo2 NRRKYAMISSPFMVVYANLLLVLYIWSFEL--PEIKKVPGFLEK-----KEPG----- 581

hPiezo1 SRHQLAMLCSPCILLYGMTLCLRYVWAMDLR-PELPTTLGPVSL-----RQLGLEHTR 510

hPiezo2 NRRKYAMISSPFMVVYGNLLLILQYIWSFEL--PEIKKVPGFLEK-----KEPG----- 581

dPiezo NQRKAMMRSSPFIYLYAEALLIAQYIYGMDLNNEELPTSVPTAGINLQQIGFERPIENQM 512

  

mPiezo1 YPCLDLGAMLLYLLTFWLLLRQFVKEKLLKQKVPAALEVTVADTEPTQT----- 567

mPiezo2 ---ELASKILFTITFWLLLRQHLTEQKALREKE-ALLSEVKIGSQELEEKEDDEELQDVQ 636

hPiezo1 YPCLDLGAMLLYTLTFWLLLRQFVKEKLLKWAESPAALTEVTVADTEPTRT----- 561

hPiezo2 ---ELASKILFTITFWLLLRQHLTEQKALQEKE-ALLSEVKIGSQENEKE-DEELQDIQ 635

dPiezo RPCVPLIVKTAFLVLMFWVTSRQFPEKRRDRRSTLADFIAPLQITVGSAG----- 563

  

mPiezo1 -----QTLRLSGLVLTGIYVYKWIYVCA 591

mPiezo2 VEGEPTEKEEEEEEEIKEERHEVKKEEEEEVEEDDDQIMKVLGNLVVALFIKYWIYVCG 696

hPiezo1 -----QTLQSLGELVKGVYKYWIYVCA 585

hPiezo2 VEGEPKE--EEEEEAKEEKQERKKVEQEEAEEDEQDQIMKVLGNLVVAMFIKYWIYVCG 692

dPiezo -----SSYLINDGKKTSKFLKAGDVIKNLLVRLWIWLLV 598

mPiezo1 GMFIVVVSFAGR-LVVYKIVYMFLFLLCLTLFQVYYTLWRKLLRVFWWLVVAYTMLVLIIV 650

mPiezo2 GMFFFVSFEGK-IVMYKIIYMVLFVFCVALYQVHYEWRKILKYFWMSVVIYTMLVLIIFI 755

hPiezo1 GMFIVVVSFAGR-LVVYKIVYMFLFLLCLTLFQVYYSLWRKLLKAFWWLVVAYTMLVLIIV 644

hPiezo2 GMFFFVSFEGK-IVMYKIIYMVLFVFCVALYQVHYEWRKILKYFWMSVVIYTMLVLIIFI 751

dPiezo LVIFLCAITGENMTGFRICYMALFLFLLLVFQSSKAWVKIMYGFWLFIFYAMSILILI 658

mPiezo1 YTFQFQDFPTYWRNLTGFTDEQGLDGLGLEQFSVSELFSSILIPGFFLLACILQLHYFHRP 710

mPiezo2 YTYQFENFPGLWQNMGTGLKKEKLEDLGLKQFTVAELFTRIFIFPTSFLLVCILHLHYFHDR 815

hPiezo1 YTFQFQDFPAYWRNLTGFTDEQGLDGLGLEQFSVSELFSSILVPGFFLLACILQLHYFHRP 704

hPiezo2 YTYQFENFPGLWQNMGTGLKKEKLEDLGLKQFTVAELFTRIFIFPTSFLLVCILHLHYFHDR 811

dPiezo YTYQFDFKFDYWSDYLNVSATLQKDIGLKRYQTKDLFLHLVSPITIVILTVIQVHYFHKR 718

mPiezo1 FMQLTDLEHVPPP--GTRHP-----RWAHRQDAVSEAPLLEHQ----- 746

mPiezo2 FLELTDLKSIPSKEDNTIYSHAKVNGRVYLIINRLAHPEGSLPDLAIMNMTASLDKPEVQ 875

hPiezo1 FMQLTDMEHVSLP--GTRLP-----RWAHRQDAVSGTPLLREEQEQHQQQQ 749

hPiezo2 FLELTDLKSIPSKEDNTIY-----RLAHPEGSLPDLTMMHLTASLEKPEVR 857

dPiezo FIASLQQQPLAGG-----SAQQKPTETTALFAPSRRRSAG 755

mPiezo1 ---EEEEVF-----REDGQSMGDPHQATQVPEGTASKWGLVADRLL 784

mPiezo2 KLAESGEERPEECVKKTEKGEAGKDSDESEEEEEDEEEEESSDLRKNKWLVIDRLLT 934

hPiezo1 EEEEEEDS-----RDEGLGVATPHQATQVPEG-AAKWGLVAERLL 789

hPiezo2 KLAEPGEEKLEGYSEKAQKGDGKDSSESEEDGEEEESEEEEEETSDLRKNKWLVIDRLLT 917

dPiezo SLRKSQGPS-----AEAAPGATTFETSVRDLVIRISFR 788

mPiezo1 DLAAFSFSAVLTRIQVFRRLLELHVFKLVALYTVVVALKEVSMNLLLVLWAFALP-YP 843

mPiezo2 VLFLKFLFLEYFHKLQVFMWVILELHIKIVSSYI I WVTVKEVSLFNIVFLISWAFALP-YA 993

hPiezo1 ELAAGFSVDLSRVQVFLRRLLELHVFKLVALYTVVVALKEVSMNLLLVLWAFALP-YP 848

hPiezo2 VLFLKFLFLEYFHKLQVFMWVILELHIKIVSSYI I WVSKEVSLFNIVFLISWAFALP-YA 976

dPiezo KIKNKSEYIFKNFKDVFWRFLLELHIMKAVYIAAFVCSVSEVCLHIFVGFVCLGATSRK 848

mPiezo1 RFRPMASCLSTVWTCIIIVCKMLYQLKIVNPHEYSSNCTEPPFNNTNLQPLEINQSLLYR 903

mPiezo2 KLRRAASSVCTVWTCVIVVCKMLYQLQTIKPNFVSNCSLPNENQTNIPLHELKNSLLYS 1053

hPiezo1 RFRPMASCLSTVWTCVIVVCKMLYQLKIVNPQYSSNCTEPPFNNTNLQPLEISQSLLYR 908

hPiezo2 KLRRLASSVCTVWTCVIVVCKMLYQLQTIKPNFVSNCSLPNENQTNIPFNELKNSLLYS 1036

dPiezo AVQVVISRLISFIVTVIVLSKMIYQIEYLSHSQHNVVCSN-NRTANNAEWIGLTKADKVT 907

mPiezo1 GPVDPANWFGVRKGYPNLGYIQNHLQILLLLVEAVVYRRQEHYRRQH-QQAPLPAQAVC 962

mPiezo2 APVDPTEWVGLRKSSPLLVLVLRNLLMLAIALAFEVTVYRHQYRYRGRN-NLTAPVSKTIF 1112

hPiezo1 GPVDPANWFGVRKGFPNLGYIQNHLQVLLLVEAIVYRRQEHYRRQH-QLAPLPAQAVF 967

hPiezo2 APIDPTEWVGLRKSSPLLVLVLRNLLMLAIALAFEVTVYRHQYRYRGRN-NLTAPVSKTIF 1095

dPiezo G-----GLMSLLRTRYIIMVIVTMHAVISLRQLQMRVKIGALNAPPTKLLF 953

mPiezo1 ADGTRQRLDQDLLSCLKYFINFFFYKFGLEICFLMAVNVIGQRMNFMVILHGCWLVAILT 1022

mPiezo2 HDITRHLDDGLINCAKYFVNYFFYKFGLETFCFLMSVNVIGQRMDFYAMHACWLIQVLY 1172

hPiezo1 ASGTRQQLDQDLLGCLKYFINFFFYKFGLEICFLMAVNVIGQRMNFMVILHGCWLVAILT 1027

hPiezo2 HDITRHLDDGLINCAKYFINYFFYKFGLETFCFLMSVNVIGQRMDFYAMHACWLIQVLY 1155

dPiezo PNITRADAEDKDLVGLVKYLLNFGFYKFGIEISLIALVSTITYRQDIVAVVYALWLVVLLL 1013

mPiezo1 RRRREAIAARLWPNYCLFLTLFLLYQYLLCLGMPALCIDYPWRWSKAIEPMSNALIKWLYL 1082

mPiezo2 RRRRKAIAEVWPKYCCFLACITTFQYFVICGIPPAPCRDYPWRFKGAY-FNDNIKWLYF 1231

hPiezo1 RRRRQAIAARLWPNYCLFLALFLLYQYLLCLGMPALCIDYPWRWSRAVPMNSALIKWLYL 1087

hPiezo2 RRRRKAIAEIVPKYCCFLACITTFQYFVICGIPPAPCRDYPWRFKGAS-FNDNIKWLYF 1214

dPiezo LR-RSQCAKIWGVFAFFAISILTQYIVLVGLPSSCLVFPWDEGPFG---EGIQRWAML 1069

mPiezo1 PDFFRAPNSTNLISDFLLLLCASQQQVFSARTTEWQRMAGINTDHLEPLRGE----- 1136

mPiezo2 PDFIVRPNPVFLVYDFMLLL CASLQRQIFEDENKAAVRIMAGDNVEICMNLDAASF---S 1288

hPiezo1 PDFFRAPNSTNLISDFLLLLCASQQQVFSARTTEWQRMAGVNTDRLEPLRGE----- 1141

hPiezo2 PDFIVRPNPVFLVYDFMLLL CASLQRQIFEDENKAAVRIMAGDNVEICMNLDAASF---S 1271

dPiezo PGALHFNHVPKLIIDFIVLVILNLRQKSFICIEQRYASNDYPGGSNRSVIADIAQLGRVP 1129

mPiezo1 -PNPVPDFIHCN-SYLDMLKVAVFRYFLWLVLVVVFVAGATRISIFGLGYLLACFYLLLF 1194

mPiezo2 QHNPVPDFIHCN-SYLDMSKVIIFSYLFWFVLTIFITGTTRISIFCMGYLVACFYFLLF 1347

hPiezo1 -PNPVPDFIHCN-SYLDMLKVAVFRYFLWLVLVVVFVAGATRISIFGLGYLLACFYLLLF 1199

hPiezo2 QHNPVPDFIHCN-SYLDMSKVIIFSYLFWFVLTIFITGTTRISIFCMGYLVACFYFLLF 1330

dPiezo FDNPTDFDCSYIRNYSIILKNGVLCGFYVFTLAVVFLAGTNIADLLALGYLIGAFIFLWQ 1189

mPiezo1 GTTLLQKDTRAQLVLWDCLILYNVTVIISKNMLSLLSCVFVEQMSNFCWVIQLFSLVCT 1254

mPiezo2 GGDLLKPKIKSILRYWDWLIAYNVFVITMKNILSIGACGYIGALVRNSCWLIQAFSLACT 1407

hPiezo1 GTALLQRDTRARLVLDCLILYNVTVIISKNMLSLLACVFVEQMQTGFCWVIQLFSLVCT 1259

hPiezo2 GGDLLKPKIKSILRYWDWLIAYNIFVITMKNILSIGACGYIGTLVHNSCWLIQAFSLACT 1390

dPiezo GSDPYLRPIHTIIFRWKWLAFNVANILIKTSFQMAGCLFMTQLTKDCCWLHVHMLGITCT 1249

mPiezo1 VKGYDYPKEMMTRDRDCLLP-----VEEAGIIWDSICFFLLQRRIFLSHYFLHVSAD 1308

mPiezo2 VKGYQMP----EDDSRCKLP-----SGEAGIIWDSICFAFLLQRRVFMSSYFLHVVAD 1457

hPiezo1 VKGYDYPKEMMTRDRDCLLP-----VEEAGIIWDSVCFLLQRRVFLSHYFLHVRAD 1313

hPiezo2 VKGYQMP----AANSPTLP-----SGEAGIIWDSICFAFLLQRRVFMSSYFLHVVAD 1440

dPiezo SNVLTEQIMLPPEAEALALKPGECPKITHQVLLWDTICFAFIIIFQLRIFKSHYFCHIITD 1309

  

mPiezo1 LKATALQASRGFALYNAANLKSINFHRQIEEKSQAQLKQMKRIAKQEKYRQSQ----- 1363

mPiezo2 IKASQILASRGAEALFQATIVKAVKARIEEKKSMQDLKQMDRIKARQQYKKGKERMLS 1517

hPiezo1 LQATALLASRGFALYNAANLKSIDFHRRIEKSQAQLKQMERIRAKQEKHRQGR----- 1368

hPiezo2 IKASQILASRGAEALFQATIVKAVKARIEEKKSMQDLKQMDRIKARQQYKKGKERMLS 1500

dPiezo TKANNILASRGADIEESLRHKQIAHRHDHEKQVLHKKIKRKMERICRATQQKMLRPLDKQTH 1369

  

mPiezo1 --ASRGQLQ-SKDPQDPSQEPGPDSPGGSSPPRRQWWRPWLHDATVIHSGDYFLFESDSE 1420

mPiezo2 LTQESGEGQDIQVSEEDDEREADKQKAKGK-KKQWWRPVDHASMVRSGDYFLFETDSE 1576

hPiezo1 --VDRSRPQDTLGPKDPGLEPGDPSGGSSPPRRQWWRPWLHDATVIHSGDYFLFESDSE 1426

hPiezo2 LTQEPGEGQDMQKLSSEEDDEREADKQKAKGK-KKQWWRPVDHASMVRSGDYFLFETDSE 1559

dPiezo FDEHGYPPLPAPTVRRRKEIKLHPHATRAGDYMFEMDDKFDLIDHEDIDFLEENITE 1429

  

mPiezo1 EEEE-----ALPEDPRPAAQSAFQMAQAWVTNAQTVLRQRR--ERARQERAEQLAS 1470

mPiezo2 EEEEE-----LKKEDDEPPRKSFAQFVYQAWITDPKTALRQRREKKKLAREEQKERK 1631

hPiezo1 EEEE-----AVPEDPRPSAQSALAYQAWVTNAQAVLRRRQEQEQARQEQAGQLPT 1479

hPiezo2 EEEEE-----LKKEDDEPPRRSAFQFVYQAWITDPKTALRQRHKEKKRSAREERKRRK 1614

dPiezo SEMKMQRKTLYDKSKDAPTGEFPSTSGISKERDAATASSSASPAPTRDVGDLVPIPPP 1489

  

mPiezo1 G---GDLNPDVEPVDVPEDEMAGRSHMQRVLS--TMQFLWVLGQATVDGLTRWLRRAFT 1524

mPiezo2 GSGDGPVEWEDREDEPVKKSQSDGPDNIKRIFN--ILKFTWVLFATVDSFTTWLNSIS 1688

hPiezo1 G---GGPSQEVPEAEGPEEAAGRSHVQVRVLS--TAQFLWMLGQALVDELTRWVQEF 1533

hPiezo2 GSKEGPVEWEDREDEPIKKSQSDGPDNIKRIFN--ILKFTWVLFATVDSFTTWLNSIS 1671

dPiezo STGLGREQTSKETSDSKSMEVDSGEVTAKDSDEDFDTPNIIRLLEGFLVTLTIRLNRFS 1549

  

mPiezo1 KHRTMSDVLCAERYLLTQ--ELLRVGEVRRGVLQDLYVGEDE-ATLSGPVETRDPGPTA 1581

mPiezo2 REHIDISTVLRIERCMLTR--EIKKGNVPTRESIHMYYQNHIMNLSRESGLDTIDEHSGA 1746

hPiezo1 RHHGTMSDVLRAERYLLTQ--ELLQGGVHRGVLQDLYTSQAE-ATLPGPTEAPNAPSTV 1590

hPiezo2 REHIDISTVLRIERCMLTR--EIKKGNVPTRESIHMYYQNHIMNLSRESGLDTIDEHPGA 1729

dPiezo RNYRFVNRILAGEKKTLESSSLNRLGLSSAAMFHFLLKSNLESDESEPPASSSTPRRV 1609

  

mPiezo1 SSGLGAEELPSMTDDTSIP----- 1601

mPiezo2 GSRQAHAHRMDSLDRSDSISSCYTEATLLISRQSTLDDLDGQDVPKTSERARPRLRKMF 1806

hPiezo1 SSGLGAEELPSSMTDDMGSP----- 1610

hPiezo2 ASGQTAHRMDSLSDSHSIS----- 1749

dPiezo IAPPNATEHSDPTSTTLNTN----- 1629

  

mPiezo1 -----LSGYNTRSGSEEIVTDAGDLQ----- 1623

mPiezo2 SLDMSSSSADSGSVASSEPTQCTMLYSRQGTTEETIEEVEAEABEEVVEGLEPELHDAEEK 1866

hPiezo1 -----LSTGYHTRSGSEEAVTDPGERE----- 1632

hPiezo2 -----SEPTQCTMLYSRQGTTEETIEEVEAEQEEAEGS-TAPEPREAKEY 1792

dPiezo -----TTTTPLSPPELQPLQPNNTSTPQQ----- 1654

  

mPiezo1 -----ACTSLHGSQEL----- 1634

mPiezo2 EYA--AEYEAGVEEISLTPDEELPQFSTDD--CEAPPSYSKAVSFEHLSFASQDSDGAKN 1922

hPiezo1 -----AGASLYQG----- 1640

hPiezo2 EATGYDVGAMGAEASLTPPEELTQFSTLDGDVEAPPSYSKAVSFEHLSFGSQDSDGAKN 1852

dPiezo -----QHGHIRAAEETIELPVDT----- 1672

  

mPiezo1 -----LANARTRMTASELLLDRLRHIPLEEAERFEAQQRTRLLR 1677

mPiezo2 HMVVPDSDSRTDKLESSILPPLTHELTASDLLMSKMFHDELEESEKFYVDQPRFLLLFY 1982

hPiezo1 -----LMRTASELLLDRLRHIPLEEAELFAEGQGRALRLR 1677

hPiezo2 RMAVSPDSDSRTDKLGSSILPPLTHELTASELLKMFHDELEESEKFYVQPRFLLLFY 1912

dPiezo -----VDGVAHRKQSIINSSPPAKGAGEFNLEENFAQRDHIIIVEVLI 1715

  

mPiezo1 AGYQCVAHSELLEYFIIILNHMVTASAASLVLPVLVFLWAMLTIPRPSKRFWMTAIVFT 1737

mPiezo2 AMYNTLVARSEMVCYFVIIILNHMTSASIIITLLLPILIFLWAMLSVPRPSRRFWMMAIVYT 2042

hPiezo1 AVYQCVAHSELLEYFIIILNHMVTASAGSLVLPVLVFLWAMLSIPRPSKRFWMTAIVFT 1737

hPiezo2 AMYNTLVARSEMVCYFVIIILNHMVSASMITLLLPILIFLWAMLSVPRPSRRFWMMAIVYT 1972

dPiezo SSWYALLANTDLICYIVVFINQVNASLISLPLPIMVFLWGTLSLPRPTKTFWVTLIAYT 1775

  

mPiezo1 EVMVVTKYLFQFGFFPWNSYVVLRRYENKPYFPPRILGLEKTDYSIKYDLVQLMALFFHR 1797

mPiezo2 EVAIVVKYFQFGFFPWNKDLEIY--KERPYFPNIIGVEKKEGYVLYDLIQLLALFFHR 2100

hPiezo1 EIAVVVKYLFQFGFFPWNSHVLRRIYENKPYFPPRILGLEKTDGYIKYDLVQLMALFFHR 1797

hPiezo2 EVAIVVKYFQFGFFPWKNVEVN--KDKPYHPNIIGVEKKEGYVLYDLIQLLALFFHR 2030

dPiezo QAVILIKCIFQFKLIWSNYHQLPN---QPLTPAKIFGVENKAHYAIDLILLVLFHR 1831



mPiezo1 SQLLCYGLWDHEEDRYPKDHCRRSSVKDREAKEEPEAKLESQSETGTGHPKEPVLAGTPRD 1857

mPiezo2 SILKCHGLWDEDDIVDSNTDKEGSDDELSDLQGR-----RGSSDSLK 2142

hPiezo1 SQLLCYGLWDHEEDSPSKEHDKSGEEEQGAEEGP-----GVPAAATED 1840

hPiezo2 SILKCHGLWDEDDMTESGMAREESDDELSDLGHGR-----RDSSDSLK 2072

dPiezo YLLKSQGLWKSgyKDTDNQFTKPTASIDERDDSD----- 1865

  

mPiezo1 HIQKGKSIRSKDVIQDPPEDLKPRHTRHISIRFRRRK-ETPGPKGTAVMETEHEEGEGKE 1916

mPiezo2 SINLAASVESVHVTTFPEQPAAIRKRKSCSSSQISPRSSFSSNRSKRGSTSTRNSSQKGS 2202

hPiezo1 HIQVEARVGTDTGTPPEQVELRPRDTRRISLRFRRRKKEGPARKGAAAI EAEDREEEEGE 1900

hPiezo2 SINLAASVESVHVTTFPEQQTAVRRKRSGSSSEPSQRSSFSSNRSKRGSTSTRNSSQKGS 2132

dPiezo -----NLSQPDSRQLNDAAQKLSLQVSQASLPGSPFESKGTGINQLERTKYTSS 1914

  

mPiezo1 TTERKRPRHTQEKSKFRERMKAAGRRLQSFVSLAQSFYQPLQRFHFDILHTKYRAAD 1976

mPiezo2 VLSLK--QKSKRELYMEKLQEHLIKAKAFTIKKTLQIVYPIRQFFYDLIHPDYSAVTDV 2259

hPiezo1 EEKEAPTGREKRPSRSGGRVRAAGRRLQGFCLSLAQGTYRPLRRFFHFDILHTKYRAATDV 1960

hPiezo2 VLSIK--QKSKRELYMEKLQEHLIKAKAFTIKKTLQIVYPIRQFFYDLIHPDYSAVTDV 2189

dPiezo -----LYKFFFSLVHKSRLA 1932

  

mPiezo1 YALMFLADIVDIIIIIFGFWAFGKHSAAAD--IASLSDQVPAFLMFLVQFGTMVID 2034

mPiezo2 YVLMFLADTVDFIIIVFGFWAFGKHSAAAD--ITSSLEDQVPGPFLVMVLIQFGTMVVD 2317

hPiezo1 YALMFLADVDFIIIIIFGFWAFGKHSAAAD--ITSSLSDQVPAFLVMLLIQFGTMVVD 2018

hPiezo2 YVLMFLADTVDFIIIVFGFWAFGKHSAAAD--ITSSLEDQVPGPFLVMVLIQFGTMVVD 2247

dPiezo YALMFLCDFVNFVLLFGFTAFTGTQTESDEGVQTYLAENKVPFPLIMLLVQFLIVID 1992

  

mPiezo1 RALYLRKTVLGLKLAFOVVLVVAIHIWMFFILPAVTERMFSQNAVAQLWYFVKCIYFALSA 2094

mPiezo2 RALYLRKTVLGLKVIQVILVFGIHFWMFFILPGVTERKFSQNLVAQLWYFVKCVYFGLSA 2377

hPiezo1 RALYLRKTVLGLKLAFOVALVLAIHLWMFFILPAVTERMFNQNVVAQLWYFVKCIYFALSA 2078

hPiezo2 RALYLRKTVLGLKVIQVILVFGIHFWMFFILPGVTERKFSQNLVAQLWYFVKCVYFGLSA 2307

dPiezo RALYLRKALVNKIIFHFVSVIGIHIWMFFVPAVTERTFNSLAPPIIFVYIKCFYMLLSS 2052

  

mPiezo1 YQIRCGYPTRILGNFLTCKYNHLNLFQGFRLVPFLVELRAVMDVWVWDTTSLSNWMC 2154

mPiezo2 YQIRCGYPTRVLGNFLTCKSYNYVNLFLFQGFRLVPFLTELRAVMDVWVWDTTSLSSWIC 2437

hPiezo1 YQIRCGYPTRILGNFLTCKYNHLNLFQGFRLVPFLVELRAVMDVWVWDTTSLSSWMC 2138

hPiezo2 YQIRCGYPTRVLGNFLTCKSYNYVNLFLFQGFRLVPFLTELRAVMDVWVWDTTSLSSWIC 2367

dPiezo YQIKSGYPKRILGNFFTCKGFSMVNMIAFKVYMQIPFLYELRTILDWVCIDSTMTIFDWLK 2112

  

mPiezo1 VEDIYANIFIIKCSRETEKKYPQPKGQKKKIVKYGMGGLIILFLIAIIFWPLLFMSLIR 2214

mPiezo2 VEDIYAHIFILKWCWRESEKRYPPRGQKKKAVKYGMGMIIVLLICIVWFPLLFMSLIK 2497

hPiezo1 VEDIYANIFIIKCSRETEKKYPQPKGQKKKIVKYGMGGLIILFLIAIIFWPLLFMSLVR 2198

hPiezo2 VEDIYAHIFILKWCWRESEKRYPPRGQKKKAVKYGMGMIIVLLICIVWFPLLFMSLIK 2427

dPiezo MEDIFSNIYLIRCTRQSETDFPAMRAQKASLSKLIMGGTIVLLIVICIWGPLCLFALGN 2172

  

mPiezo1 SVVGVNQPIDVTVTLKLGGEPLFTMSAQQPSIVPFTPAQAYEELSQQFDPYPLAMQFIS 2274

mPiezo2 SVAGVINQPLDVSVTITLGGYQPIFTMSAQQSQLKMDNSKYNEFLKSGFPGNSGAMQFLE 2557

hPiezo1 SVVGVNQPIDVTVTLKLGGEPLFTMSAQQPSIIPFTAQAYEELSRQFDPYPLAMQFIS 2258

hPiezo2 SVAGVINQPLDVSVTITLGGYQPIFTMSAQQSQLKMDQSFNKFIQAFSRDTGAMQFLE 2487

dPiezo -AVGTSNVPFHVSLSIRIGPYDPIYTTNN-YDSIFEINPEMYSQMTNAYIKEKQALTFIA 2230

  

mPiezo1 QYSPEDIVTAQIEGSSGALWRISPPSRAQMKQELYNGTADITLRFWTFQRDLAKGGTVE 2334

mPiezo2 NYEREDVTVAELEGNSNSLWTISPPSKQKMIQELTDPNSCFVSVSWSIQRNMTLGAKAE 2617

hPiezo1 QYSPEDIVTAQIEGSSGALWRISPPSRAQMKRELYNGTADITLRFWTFQRDLAKGGTVE 2318

hPiezo2 NYEKEDITVAELEGNSNSLWTISPPSKQKMIHELDPNSFSVSVSWSIQRNLSLGAKSE 2547

dPiezo GYDATDVAAVRLAGNSPSLWNIAPPDRQLLNDLRN-NHTLKARFYSYSLTRKAPAKGLKE 2289

  

mPiezo1 YINEKHTLELAPNSTARRQLAQLLEGRPDQS-----VVIPLHFPKYI 2376

mPiezo2 IATDKLSFPLAV--ATRSIAKMIAGNDESSNTP-----VTIEKIYPYV 2661

hPiezo1 YANEKHLALAPNSTARRQLASLLEGTSDQS-----VVIPLHFPKYI 2360

hPiezo2 IATDKLSFPLKN--ITRKNIAKMIAGNSTESSKTP-----VTIEKIYPYV 2591

dPiezo NVGDEHAISLDESFEGRAALIHMLSETHDVEPIHSNGTNGTTPVEVEVVVPIGMI PKFI 2349

  

mPiezo1 RAPNGPEANPVKQLQDPDEEEDYLGVRIQLRREQVGTGASGEQAGTKASDFLEWVWVIELQD 2436

mPiezo2 KAPSDSNSKPIKQLLS--ENNFMNITIIIFRDNVTKSNSE-----WVVLNLTG 2707

hPiezo1 RAPNGPEANPVKQLQPNEEADYLGVRIQLRREQ-GAGATG-----FLEWVWVIELQE 2410

hPiezo2 KAPSDSNSKPIKQLLS--ENNFMNITIIILSRDNTTKYNSE-----WVVLNLTG 2637

dPiezo KVLNSGDAAVVSVLSP-KHYDYRPLVIMKMRDNETNGLWWEIRDYCN----DTFYNETLS 2404

  

mPiezo1 CKADCN---LLPMVIFSDKVSPPSLGFLAGYGVGLYVSVVLVVGKFRVGFSEI SHSIM 2493

mPiezo2 SRIFNQGSQALELVFVNDKVSPPSLGFLAGYGVGLYVSVVLVIGKFRVGFSEI SHSIM 2767

hPiezo1 CRTDCN---LLPMVIFSDKVSPPSLGFLAGYGVGLYVSVVLVIGKFRVGFSEI SHSIM 2467

hPiezo2 NRIYNPNSQALELVFVNDKVSPPSLGFLAGYGVGLYVSVVLVIGKFRVGFSEI SHSIM 2697

dPiezo KFAYSNCTSGIVMYTFNDKVPSTFSFLTAGGIIGLYTTFVLLASRFMKSFIGGQNRKIM 2464



```

mPiezo1      FEELPCVDRILKLCQDIFLVRETRELEEEELYAKLIFLYRSPETMIKWTRERE----- 2547
mPiezo2      FEELPNVDRILKLCQDIFLVRETGELEEEEDLYAKLIFLYRSPETMIKWTRKTN----- 2822
hPiezo1      FEELPCVDRILKLCQDIFLVRETRELEEEELYAKLIFLYRSPETMIKWTRERE----- 2521
hPiezo2      FEELPNVDRILKLCQDIFLVRETGELEEEEDLYAKLIFLYRSPETMIKWTRKTN----- 2752
dPiezo       FEDLPYVDRVLQCLDIYLVREALEFALEEDLFAKLLFLYRSPETLIKWTRPKEEYVDDD 2524

mPiezo1      -----
mPiezo2      -----
hPiezo1      -----
hPiezo2      -----
dPiezo       GDTDSIPSRMSVRRPEQLQPQQPQ 2548

```

### Supplementary Figure 3. Alignment between mouse, human and fly Piezos highlights

**hydrophobic regions and residues of interest.** Multiple sequence alignment between

mPiezo1, mPiezo2, hPiezo1, hPiezo2 and dPiezo generated using ClustalW2

(<http://www.ebi.ac.uk/Tools/msa/clustalw2/>). Residues highlighted in grey indicate proposed

hydrophobic regions in mPiezo1. Residues highlighted in cyan indicate position of myc-tags in

extracellular loops. Residues highlighted in pink indicate phosphorylation sites. Residues

highlighted in green indicate junction points for the following mPiezo1/dPiezo chimeras; ASRG:

dP<sup>1-1316</sup>/mP1<sup>1316-2547</sup> and mP1<sup>1-1315</sup>/dP<sup>1317-2548</sup>, FLW: dP<sup>1-1752</sup>/mP1<sup>1715-2547</sup> and mP1<sup>1-1714</sup>/dP<sup>1753-2548</sup>

and TDV: dP<sup>1-1929</sup>/mP1<sup>1974-2547</sup> and mP1<sup>1-1973</sup>/dP<sup>1930-2548</sup>. Residues highlighted in yellow indicate

acidic residues between regions of amino acid numbers 1974-2547 that were mutated to

alanine or asparagine.

|           |          |       |         |             |       |          |       |        |         |            |          |      |
|-----------|----------|-------|---------|-------------|-------|----------|-------|--------|---------|------------|----------|------|
| human     | HsPiezo1 | GNFLT | KKYNHLN | FLFQGFRLV   | PFLV  | ELRAVMDW | VWTD  | TTL    | SLSSWMC | VEDIYANIFI | IK       | 2150 |
|           | HsPiezo2 | GNFLT | KSYNVN  | FLFQGFRLV   | PFLTE | ELRAVMDW | VWTD  | TTL    | SLSSWIC | VEDIYAHIFI | LK       | 2379 |
| mouse     | MmPiezo1 | GNFLT | KKYNHLN | FLFQGFRLV   | PFLV  | ELRAVMDW | VWTD  | TTL    | SLSNWMC | VEDIYANIFI | IK       | 2166 |
|           | MmPiezo2 | GNFLT | KSYNVN  | FLFQGFRLV   | PFLTE | ELRAVMDW | VWTD  | TTL    | SLSSWIC | VEDIYAHIFI | LK       | 2451 |
| zebrafish | DrPiezo1 | GNFLT | KKFNHLN | FLFQGFRLV   | PFLV  | ELRAVMDW | VWTD  | TTL    | SLSNWMC | VEDIYANIFI | IK       | 2165 |
|           | DrPiezo2 | GNFLT | KSYNYAN | FLFQGFRLI   | PFLTE | ELRAVMDW | VWTD  | TTL    | SLSSWIC | VEDIYAHIFI | LK       | 2586 |
| snake     | PbPiezo1 | GNFLT | KKYNHLN | FLFQGFRLV   | PFLV  | ELRAVMDW | VWTD  | TTL    | SLSNWMC | VEDIYANIFI | IK       | 1939 |
|           | PbPiezo2 | GNFLT | KSYNVN  | FLFQGFRLV   | PFLTE | ELRAVMDW | VWTD  | TTL    | SLSSWIC | VEDIYAHIFI | LK       | 2399 |
| bird      | MvPiezo1 | GNFLT | KKYNLNL | FLFQGFRLV   | PFLV  | ELRAVMDW | VWTD  | TTL    | SLSNWMC | VEDIYANIFI | IK       | 2156 |
|           | MvPiezo2 | GNFLT | KSYNVN  | FLFQGFRLV   | PFLTE | ELRAVMDW | VWTD  | TTL    | SLSSWIC | VEDIYAHIFI | LK       | 2457 |
| fly       | DmPiezo  | GNFFT | KGFSMVN | MIAFKVMQI   | PFLY  | ELRTILDW | VCID  | STMTIF | DWLK    | MEDI       | FSNIYLIR | 2124 |
| spider    | CsPiezo  | GNFF  | CKKYNAN | FLFKGYMI    | PFLY  | ELRSLMDW | IWTD  | TSMNIS | NWLK    | MEDI       | YANIFVLK | 2134 |
| alga      | GsPiezo  | GQFL  | LRFSAWG | MFFNLYYMT   | PFLY  | ELRTILDW | TMIP  | TSMECF | DWMKY   | SDIWI      | SLYRNK   | 2412 |
| flower    | AtPiezo  | RQFLT | SEVSRIN | YGYRLYRAL   | PFLY  | ELRCVLDW | SCTAT | SLTMYD | WLKLE   | DVNAS      | SLYLVK   | 2105 |
| amoeba    | DdPiezo  | NRFL  | MDGYSDF | HNIGYALYKAI | PFVY  | ELRTLLDW | IATD  | TMLFYD | WLKF    | EDLY       | STIFSVK  | 2648 |
|           |          | .*    | :       | :           | **    | ***      | ::**  | :::    | .*      | .*         | ::       | :    |

**Supplementary Figure 4. Conservation of a glutamic acid residue involved in ion conduction properties of Piezo channels.** Multiple sequence alignment of Piezo proteins from different species using Clustal Omega (<http://www.ebi.ac.uk/Tools/msa/clustalo/>). Alignment of only the region around mouse Piezo1 E2133 (red box) is shown. The yellow boxes highlight conserved residues among species close to mouse Piezo1 E2133. The sequences used for the alignment are:

Homo sapiens: HsPiezo1 (NP\_001136336.2) and HsPiezo2 (NP\_071351.2)

Mus musculus: MmPiezo1 (ADN28064.1) and MmPiezo2 (NP\_001034574.4)

Danio rerio: DrPiezo1 (XP\_696355.4) and DrPiezo2 (XP\_003198010.2)

Python bivittatus: PbPiezo1 (XP\_007431683.1) and PbPiezo2 (XP\_007433600.1)

Manacus vitellinus: MvPiezo1 (XP\_008925897.1) and MvPiezo2 (XP\_008923830.1)

Drosophila melanogaster: DmPiezo (AFB77909.1)

Cupiennius salei: CsPiezo (JAA92956.1)

Galdieria sulphuraria: GsPiezo (XP\_005703632.1)

Arabidopsis thaliana: AtPiezo (NP\_182327.6)

Dictyostelium discoideum: DdPiezo (Q54S52.1)

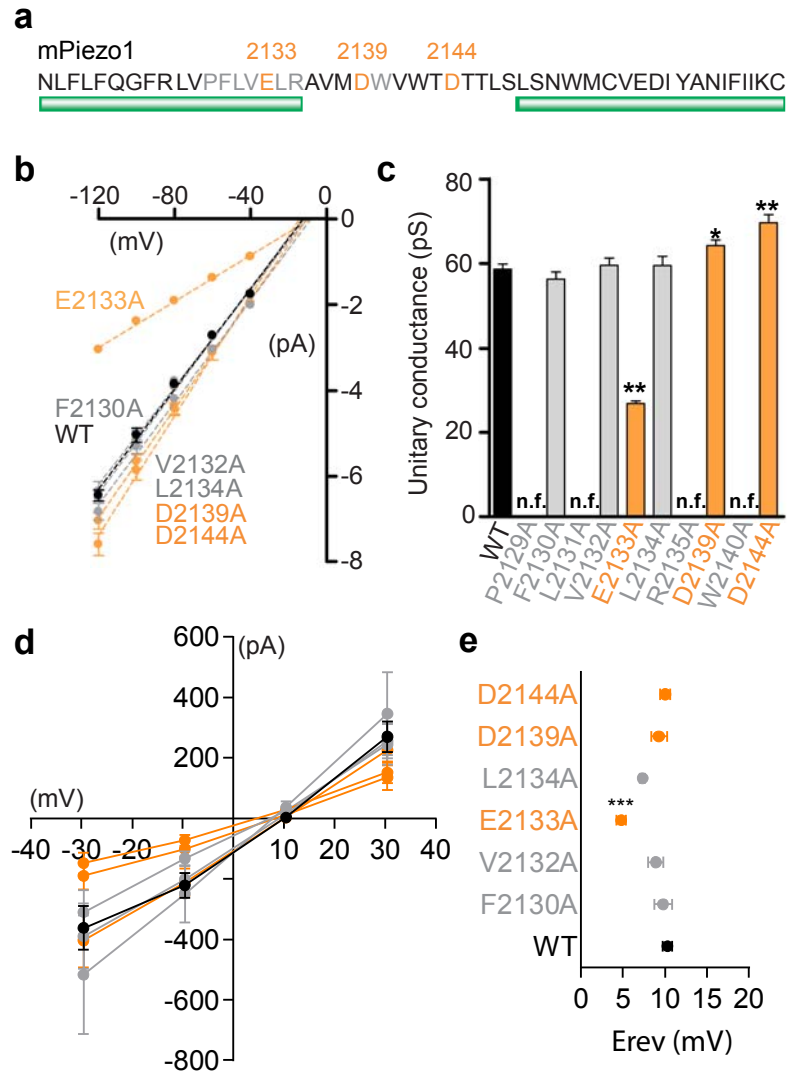

**Supplementary Figure 5. Unitary conductance and ion selectivity of alanine single point mutants around E2133.**

(a) mPiezo1 sequence around E2133. Green bars indicate hydrophobic regions. E2133 and other acidic residues are highlighted in orange. Other conserved residues in this region are marked in grey. (b) Average I-V relationships of stretch-activated single channels in mPiezo1 WT and F2130A, V2132A, E2133A, L2134A, D2139A and D2144A transfected cells ( $n = 7, 6, 4, 4, 5, 7, \text{ and } 4$ , respectively; mean  $\pm$  s.e.m.). Single-channel amplitude was determined as the amplitude difference in Gaussian fits of full-trace histograms. (c) Unitary conductance of stretch-activated channels from mPiezo1 WT and specified single point mutants transfected cells. P2129A, L2131A, R2135A and W2140A mutants are non-

functional. Conductance is calculated from the slope of linear regression line of individual cell single-channel I-V relationships (mean  $\pm$  s.e.m.; One-way ANOVA with Dunn's comparison relative to WT, \*\*P<0.01, \*P<0.05). Panel b and c experiments were done in Na<sup>+</sup>-based pipette solution. **(d)** Average I-V relationships of MA currents recorded from mPiezo1 WT, F2130A, V2132A, E2133A, L2134A, D2139A and D2144A expressing cells with 150 mM CsCl based intracellular solution and 100 mM CaCl<sub>2</sub> extracellular solution (n = 9, 5, 6, 9, 5, 7 and 7, respectively). **(e)** E<sub>rev</sub> potential for the indicated mutants corresponding to panel **(d)** experiments WT: 10.3  $\pm$  0.6 mV; F2130A: 9.8  $\pm$  1.0 mV; V2132A: 8.9  $\pm$  0.9 mV; E2133A: 4.8  $\pm$  0.6 mV; L2134A: 7.3  $\pm$  0.3 mV; D2139A: 9.3  $\pm$  0.9 mV; D2144A: 10.0  $\pm$  0.6 mV; mean  $\pm$  s.e.m.; One-way ANOVA with Dunn's comparison to WT \*\*\*P<0.001).

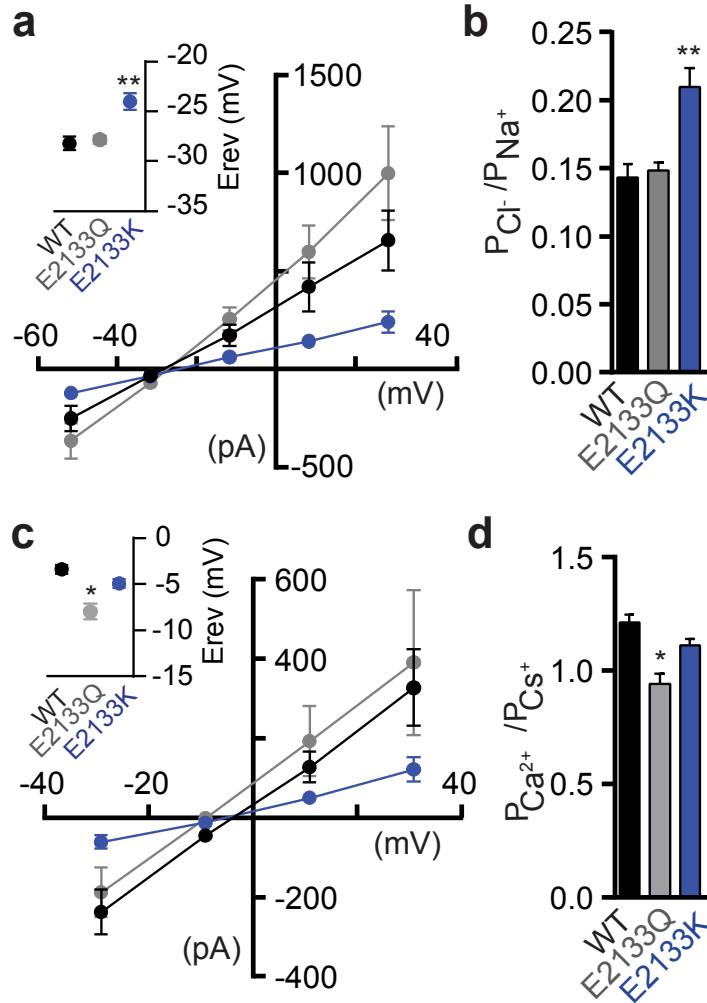

**Supplementary Figure 6. Chloride and Calcium permeability for E2133 mutants. (a)**

Average I-V relationships of MA currents recorded from mPiezo1 WT, E2133Q and E2133K expressing cells with 150 mM NaCl based intracellular solution and 30 mM NaCl extracellular solution. Inset: Average reversal potential (mean  $\pm$  s.e.m.; n = 6, 7 and 6, respectively; One-way ANOVA with Dunn's comparison to WT \*\*P<0.01). **(b)**  $P_{Cl^-}/P_{Na^+}$  permeability ratios of MA currents from cells transfected with mPiezo1 WT, E2133Q and E2133K (mean  $\pm$  s.e.m.; n = 6, 7 and 6, respectively; One-way ANOVA with Dunn's comparison to WT \*\*P<0.01). **(c)** Average I-V relationships of MA currents recorded from mPiezo1 WT, E2133Q, and E2133K expressing cells with 149 mM Cs-methanesulfonate, 1 mM CsCl based intracellular solution and 50 mM Ca-Gluconate, 0.5 CaCl<sub>2</sub> based extracellular solution. Inset: Average reversal potential (mean  $\pm$

s.e.m.; n = 6, 6, and 5, respectively; One-way ANOVA with Dunn's comparison to WT \*P<0.05).

(d)  $P_{Ca}/P_{Cs}$  permeability ratios of MA currents from cells transfected with mPiezo1 WT, E2133Q, and E2133K (mean  $\pm$  s.e.m.; n = 6, 6, and 5, respectively; One-way ANOVA with Dunn's comparison to WT \*P<0.05).

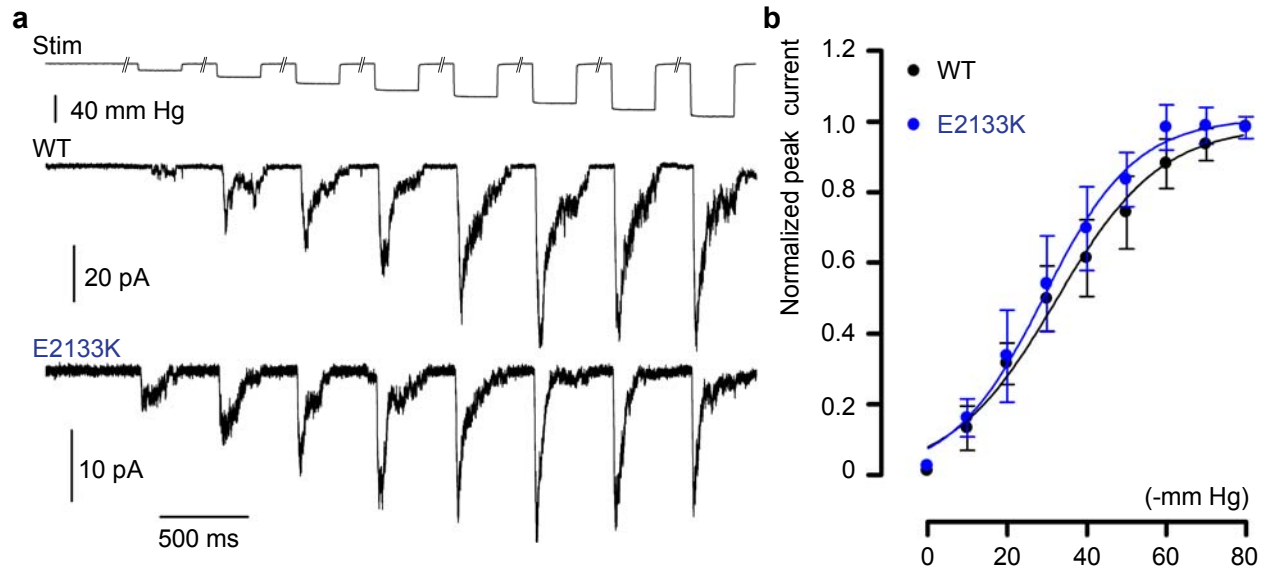

**Supplementary Figure 7. Pressure sensitivity for WT and E2133K mutant.** (a) Representative cell-attached stretch activated current traces recorded from HEK293T cells expressing WT or E2133K mPiezo1 at -80 mV with standard pipette solution (see methods). Patches are stimulated with 250-ms negative pressure pulses from 0 to -80 mmHg elicited every 10 seconds (-10 mm Hg increments). (b) Average peak current-pressure relationships of stretch activated currents recorded from WT or E2133K mPiezo1 expressing cells as illustrated in (a) ( $n = 4$  and  $5$  cells, respectively). Bars indicate mean  $\pm$  s.e.m. Fits with boltzman equation give pressure for half maximal activation ( $P_{50}$ ) of  $32.3 \pm 3.0$  and  $29.3 \pm 2.9$  mm Hg for WT and E2133K, respectively.



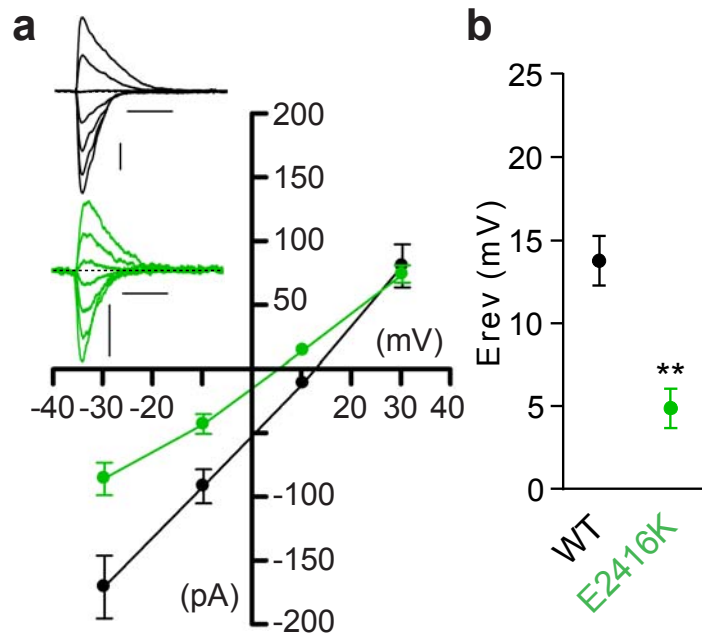

**Supplementary Figure 8. Ion selectivity altered by mPiezo2 mutant.** (a) Average I-V relationships of MA currents recorded from mPiezo2 WT and E2416K expressing cells with 150 mM CsCl based intracellular solution and 100 mM CaCl<sub>2</sub> extracellular solution (n = 6 for each). Inset: typical recording traces for WT (black) and E2416K (green) from -69.6 to +50.4 mV, Δ20 mV. Scale bars: 100 pA, 50 ms. Probe stimulation displacements are 5 and 9 μm, respectively. (b) Average reversal potentials from individual cells corresponding to panel (a) experiments (mean ± s.e.m.; Mann-Whitney test, \*\*P<0.01).

**Supplementary Table 1. Summary of Myc tag analysis used for topology prediction.**

| <b>Amino acid position for Myc tag</b> | <b>Live labelling*</b> |
|----------------------------------------|------------------------|
| N-terminal                             | -                      |
| C-terminal                             | -                      |
| 102                                    | +                      |
| 153                                    | -                      |
| 221                                    | -                      |
| 304                                    | +                      |
| 382                                    | -                      |
| 443                                    | -                      |
| 508                                    | +                      |
| 562                                    | -                      |
| 606                                    | -                      |
| 669                                    | +                      |
| 753                                    | -                      |
| 802                                    | -                      |
| 897                                    | +                      |
| 940                                    | -                      |
| 1000                                   | -                      |
| 1026                                   | -                      |
| 1071                                   | +                      |
| 1126                                   | -                      |
| 1163                                   | -                      |
| 1178                                   | -                      |
| 1204                                   | -                      |
| 1239                                   | -                      |
| 1269                                   | -                      |
| 1299                                   | -                      |
| 1389                                   | -                      |
| 1699                                   | -                      |
| 1765                                   | +                      |
| 1797                                   | -                      |
| 1891                                   | -                      |
| 1892                                   | -                      |
| 2009                                   | -                      |
| 2035                                   | -                      |
| 2041                                   | -                      |
| 2071                                   | +                      |
| 2075                                   | +                      |
| 2086                                   | -                      |
| 2104                                   | -                      |
| 2126                                   | -                      |
| 2143                                   | -                      |
| 2146                                   | -                      |
| 2157                                   | -                      |
| 2173                                   | -                      |
| 2336                                   | +                      |

\*Negative for live labeling does not mean that the tag is intracellular.

**Supplementary Table 2. Potential phosphorylated residues in peptide sequences detected by mass spectroscopy**

| Phosphorylated residue position | Phosphorylation residue | Peptide sequence                           | Total |
|---------------------------------|-------------------------|--------------------------------------------|-------|
| 351                             | T                       | KETPREDEEHELELDHLEPEPQAR                   | 5     |
| 396                             | T                       | DATQGEMPMTTEPDLNCTVHVLTSQSPVR              | 1     |
| 397                             | S                       | DATQGEMPMTTEPDLNCTVHVLTSQSPVR              | 1     |
| 399                             | S                       | DATQGEMPMTTEPDLNCTVHVLTSQSPVR              | 11    |
| 738                             | S                       | QDAVSEAPLLEHQEEEEVFREDGQSMGDPHQATQVPEGTASK | 1     |
| 758                             | S                       | QDAVSEAPLLEHQEEEEVFREDGQSMGDPHQATQVPEGTASK | 1     |
| 1385                            | S                       | DPQDPSQEPGPDSPGGSSPPR                      | 28    |
|                                 |                         | DPQDPSQEPGPDSPGGSSPPRR                     | 23    |
|                                 |                         | GQLQSKDPQDPSQEPGPDSPGGSSPPR                | 3     |
|                                 |                         | LQSKDPQDPSQEPGPDSPGGSSPPRRQW               | 2     |
|                                 |                         | QSKDPQDPSQEPGPDSPGGSSPPRRQW                | 2     |
|                                 |                         | SKDPQDPSQEPGPDSPGGSSPPRRQW                 | 1     |
| 1389                            | S                       | DPQDPSQEPGPDSPGGSSPPR                      | 8     |
|                                 |                         | DPQDPSQEPGPDSPGGSSPPRR                     | 7     |
| 1390                            | S                       | DPQDPSQEPGPDSPGGSSPPR                      | 5     |
|                                 |                         | DPQDPSQEPGPDSPGGSSPPRR                     | 13    |
| 1593                            | S                       | QSKDPQDPSQEPGPDSPGGSSPPRRQW                | 2     |
|                                 |                         | DGPSTASSGLGAEELSSMTDDTSSPLSTGYNTR          | 1     |
| 1600                            | S                       | DGPSTASSGLGAEELSSMTDDTSSPLSTGYNTR          | 4     |
| 1604                            | T                       | DGPSTASSGLGAEELSSMTDDTSSPLSTGYNTR          | 2     |
| 1608                            | T                       | NTRSGSEEIVTDAGDLQAGTSLHGSQEL               | 1     |
|                                 |                         | NTRSGSEEIVTDAGDLQAGTSLHGSQELL              | 1     |
| 1610                            | S                       | NTRSGSEEIVTDAGDLQAGTSLHGSQELL              | 2     |
|                                 |                         | SGSEEIVTDAGDLQAGTSLHGSQELLANAR             | 2     |
| 1612                            | S                       | NTRSGSEEIVTDAGDLQAGT                       | 2     |
|                                 |                         | NTRSGSEEIVTDAGDLQAGTSL                     | 4     |
|                                 |                         | NTRSGSEEIVTDAGDLQAGTSLHGSQEL               | 2     |
|                                 |                         | NTRSGSEEIVTDAGDLQAGTSLHGSQELL              | 1     |
|                                 |                         | SGSEEIVTDAGDLQAGTSLHGSQELLANAR             | 9     |
| 1617                            | T                       | NTRSGSEEIVTDAGDLQAGTSLHGSQELL              | 1     |
| 1626                            | T                       | SGSEEIVTDAGDLQAGTSLHGSQELLANAR             | 1     |
| 1627                            | S                       | SGSEEIVTDAGDLQAGTSLHGSQELLANAR             | 6     |
| 1631                            | S                       | NTRSGSEEIVTDAGDLQAGTSLHGSQELL              | 4     |
|                                 |                         | NTRSGSEEIVTDAGDLQAGTSLHGSQELLAN            | 1     |
|                                 |                         | NTRSGSEEIVTDAGDLQAGTSLHGSQELLANARTRM       | 1     |
|                                 |                         | SGSEEIVTDAGDLQAGTSLHGSQELLANAR             | 19    |
| 1640                            | T                       | NTRSGSEEIVTDAGDLQAGTSLHGSQELLANARTRM       | 1     |
| 1644                            | T                       | MRTASELLDR                                 | 1     |
|                                 |                         | RTASELLDR                                  | 1     |
|                                 |                         | RTASELLDRRLHIPELEEAERF                     | 1     |
| 1646                            | S                       | MRTASELLDR                                 | 5     |
|                                 |                         | RTASELLDR                                  | 4     |
|                                 |                         | RTASELLDRRLHIPELEEAERF                     | 7     |
|                                 |                         | TASELLDR                                   | 6     |
|                                 |                         | TASELLDRR                                  | 9     |
| 1837                            | S                       | LESQSETGTGHPK                              | 7     |

**Supplementary Table 3. Pharmacological and biophysical properties of mPiezo1/dPiezo chimeras and mPiezo mutants**

|                                                | 30 $\mu$ M ruthenium red inhibition at -80 mV (%) | Inactivation time constant at -80mV (tau in ms) | Unitary conductance (pS)  |                                         |
|------------------------------------------------|---------------------------------------------------|-------------------------------------------------|---------------------------|-----------------------------------------|
|                                                |                                                   |                                                 | Standard pipette solution | Na <sup>+</sup> -based pipette solution |
| <b>WT channels</b>                             |                                                   |                                                 |                           |                                         |
| mPiezo1                                        | 71.4 $\pm$ 4.4 (5)                                | 9.9 $\pm$ 0.5 (31)                              | 29.1 $\pm$ 0.4 (7)        | 58.6 $\pm$ 1.2 (7)                      |
| mPiezo2                                        | 70.8 $\pm$ 1.4 (5)                                | 4.5 $\pm$ 0.7 (6)                               | 23.7 $\pm$ 0.6 (8)        | 56.9 $\pm$ 1.3 (9)                      |
| dPiezo                                         | 5.2 $\pm$ 6.7 (5)                                 | 6.1 $\pm$ 0.5 (6)                               | 5.7 $\pm$ 0.6 (6)         | n.d.                                    |
| <b>Chimeras</b>                                |                                                   |                                                 |                           |                                         |
| mP1 <sup>1-1315</sup> /dP <sup>1317-2548</sup> | Non-functional                                    |                                                 |                           |                                         |
| dP <sup>1-1316</sup> /mP1 <sup>1316-2547</sup> | 64.8 $\pm$ 6.7 (5)                                | 15.9 $\pm$ 0.8 (30)                             | 23.4 $\pm$ 1.0 (5)        | n.d.                                    |
| mP1 <sup>1-1714</sup> /dP <sup>1753-2548</sup> | Non-functional                                    |                                                 |                           |                                         |
| dP <sup>1-1752</sup> /mP1 <sup>1715-2547</sup> | 76.4 $\pm$ 5.3 (6)                                | 25.5 $\pm$ 1.3 (5)                              | 27 $\pm$ 1 (5)            | n.d.                                    |
| mP1 <sup>1-1973</sup> /dP <sup>1930-2548</sup> | 1.3 $\pm$ 13 (5)                                  | 4.5 $\pm$ 0.5 (5)                               | 9.1 $\pm$ 0.8 (6)         | n.d.                                    |
| <b>mPiezo1 mutants</b>                         |                                                   |                                                 |                           |                                         |
| D1975N                                         | 74.3 $\pm$ 4.8 (4)                                | 7.7 $\pm$ 1.2 (9)                               | 31.4 $\pm$ 1.1 (4)        | n.d.                                    |
| D1984A                                         | 78.0 $\pm$ 5.9 (4)                                | 9.7 $\pm$ 1.2 (10)                              | 30.2 $\pm$ 0.6 (3)        | n.d.                                    |
| D1987A                                         | 79.5 $\pm$ 2.5 (2)                                | 19.1 $\pm$ 1.9 (11)                             | 28.1 $\pm$ 0.8 (8)        | n.d.                                    |
| D2006A                                         | 59.6 $\pm$ 7.7 (3)                                | 11.3 $\pm$ 1.7 (9)                              | 28.3 $\pm$ 0.7 (9)        | n.d.                                    |
| D2013A                                         | 56.5 $\pm$ 9.5 (4)                                | 5.3 $\pm$ 0.4 (3)                               | 28.5 $\pm$ 1.8 (6)        | n.d.                                    |
| D2014A                                         | 54.1 $\pm$ 5.6 (6)                                | 4.2 $\pm$ 0.6 (13)                              | 27.8 $\pm$ 1.5 (4)        | n.d.                                    |
| D2034N                                         | 74.8 $\pm$ 7.1 (2)                                | 11.0 $\pm$ 1.5 (9)                              | 30.3 $\pm$ 0.2 (3)        | n.d.                                    |
| E2070A                                         | 64.1 $\pm$ 2 (6)                                  | 11.7 $\pm$ 3.7 (3)                              | 25.4 $\pm$ 1.1 (4)        | n.d.                                    |
| P2129A                                         | Non-functional                                    |                                                 |                           |                                         |
| F2130A                                         | n.d.                                              | 4.3 $\pm$ 0.7 (4)                               | n.d.                      | 56.3 $\pm$ 1.7 (6)                      |
| L2131A                                         | Non-functional                                    |                                                 |                           |                                         |
| V2132A                                         | n.d.                                              | 9.6 $\pm$ 0.6 (3)                               | n.d.                      | 59.5 $\pm$ 1.7 (4)                      |
| E2133A                                         | 61.1 $\pm$ 11.8 (3)                               | 18.2 $\pm$ 2.8 (10)                             | 14.4 $\pm$ 0.5 (5)        | 26.8 $\pm$ 0.6 (4)                      |
| E2133D                                         | 85 $\pm$ 2.0 (2)                                  | 35.8 $\pm$ 1.5 (32)                             | n.d.                      | 77.5 $\pm$ 3.0 (5)                      |
| E2133Q                                         | 74.6 $\pm$ 6.2 (5)                                | 29.5 $\pm$ 1.8 (26)                             | n.d.                      | 30.5 $\pm$ 1.3 (5)                      |
| E2133K                                         | 8.1 $\pm$ 7.1 (10)                                | 12.2 $\pm$ 0.6 (9)                              | n.d.                      | 20.0 $\pm$ 1.3 (4)                      |
| L2134A                                         | n.d.                                              | 5.3 $\pm$ 1.6 (4)                               | n.d.                      | 59.4 $\pm$ 2.1 (5)                      |
| R2135A                                         | Non-functional                                    |                                                 |                           |                                         |
| D2139A                                         | 57.2 $\pm$ 6.7 (4)                                | 7.7 $\pm$ 0.8 (12)                              | 32.4 $\pm$ 1.5 (4)        | 64.2 $\pm$ 1.2 (7)                      |
| W2140A                                         | Non-functional                                    |                                                 |                           |                                         |
| D2144A                                         | 63.0 $\pm$ 7.2 (3)                                | 18.3 $\pm$ 1.5 (11)                             | 30.6 $\pm$ 1.0 (4)        | 69.6 $\pm$ 1.8 (4)                      |
| E2156A                                         | 57.0 $\pm$ 4.3 (4)                                | 6.4 $\pm$ 0.4 (14)                              | 26.5 $\pm$ 0.9 (5)        | n.d.                                    |
| D2157A                                         | 65.0 $\pm$ 6.0 (3)                                | 8.8 $\pm$ 0.7 (19)                              | 29.7 $\pm$ 1.0 (3)        | n.d.                                    |
| E2170A                                         | 69.0 $\pm$ 1.0 (2)                                | 11.6 $\pm$ 1.3 (3)                              | 27.8 $\pm$ 0.1 (3)        | n.d.                                    |
| E2172A                                         | 75.3 $\pm$ 7.0 (3)                                | 8.4 $\pm$ 0.9 (3)                               | 24.3 $\pm$ 0.3 (4)        | n.d.                                    |
| <b>mPiezo2 mutant</b>                          |                                                   |                                                 |                           |                                         |
| E2416K                                         | 49.6 $\pm$ 4.6 (5)                                | 5.7 $\pm$ 0.5 (5)                               | n.d.                      | 32.6 $\pm$ 1.0 (6)                      |

Mean  $\pm$  s.e.m. (n-number); n.d.: not determined
